# Supplementary material for: Multi-model dynamic climate emulator for solar geoengineering
Source: Copernicus journal article supplement (doi:10.5194/acp-2016-535), 2016-06-24
Supplement: Supplementary file 1 [file acp-2016-535-supplement.pdf]

# Supplementary Material for Multi-model dynamic climate emulator for solar geoengineering

Douglas G. MacMartin, Ben Kravitz

June 12, 2016

1 The list of climate models that participated in the Geoengineering Modeling Intercomparison  
2 Project (GeoMIP) and are used here is given in Table S1; Figure S1 illustrates the GeoMIP G1  
3 and G2 simulations that are used to construct and validate the emulator respectively. Several  
4 additional emulator results are given in Figures S2 and S3, comparing the simulated and emulated  
5 temperature and precipitation differences between land and ocean. Figure S4 illustrates for one  
6 model the emulator capturing of the first few principal components of the spatial temperature  
7 response. Figure S5 illustrates the ability of the dynamic emulator to capture modeled changes in  
8 Net Primary Productivity (NPP); changes in global-mean NPP are relatively linear in these climate  
9 models, and relatively unaffected by a solar reduction.

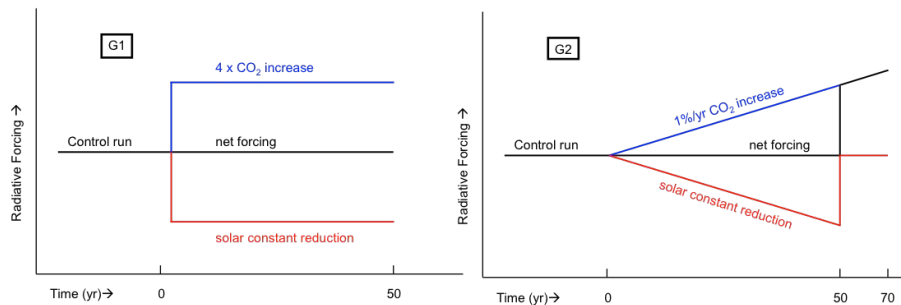

Figure S1: Schematic of GeoMIP G1 and G2 simulations.

| Climate Model  | Solar Reduction for G1 (%) |
|----------------|----------------------------|
| CanESM2        | 4.0                        |
| CESM-CAM5.1-FV | 4.7                        |
| GISS-E2-R      | 4.5                        |
| HadCM3         | 4.1                        |
| HadGEM2-ES     | 3.9                        |
| IPSL-CM5A-LR   | 3.5                        |
| MIROC-ESM      | 5.0                        |
| MPI-ESM-LR     | 4.7                        |
| CSIRO-Mk3L-1.2 | 3.2                        |

Table S1: Climate models used here, with the solar reduction  $g_{4\times}$  used in each model to compensate for  $4\times\text{CO}_2$

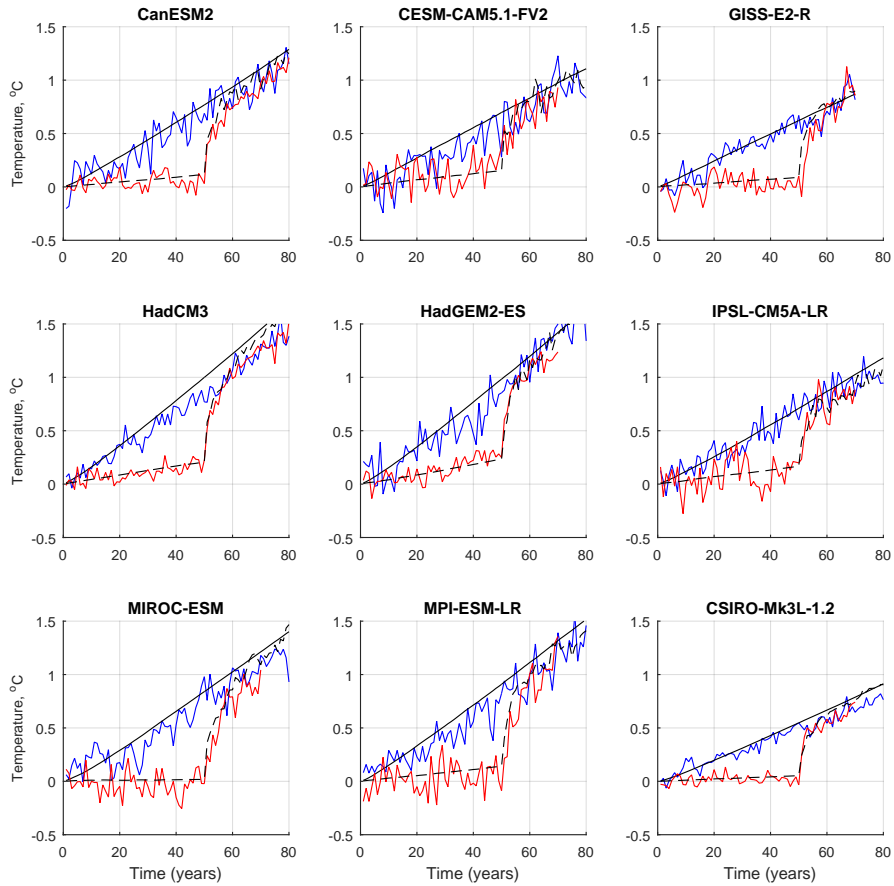

Figure S2: As in Figure 2 but for difference between average temperature over land and average temperature over oceans, for 1% per year increase in  $\text{CO}_2$  and GeoMIP experiment G2 for each of the climate models considered here.

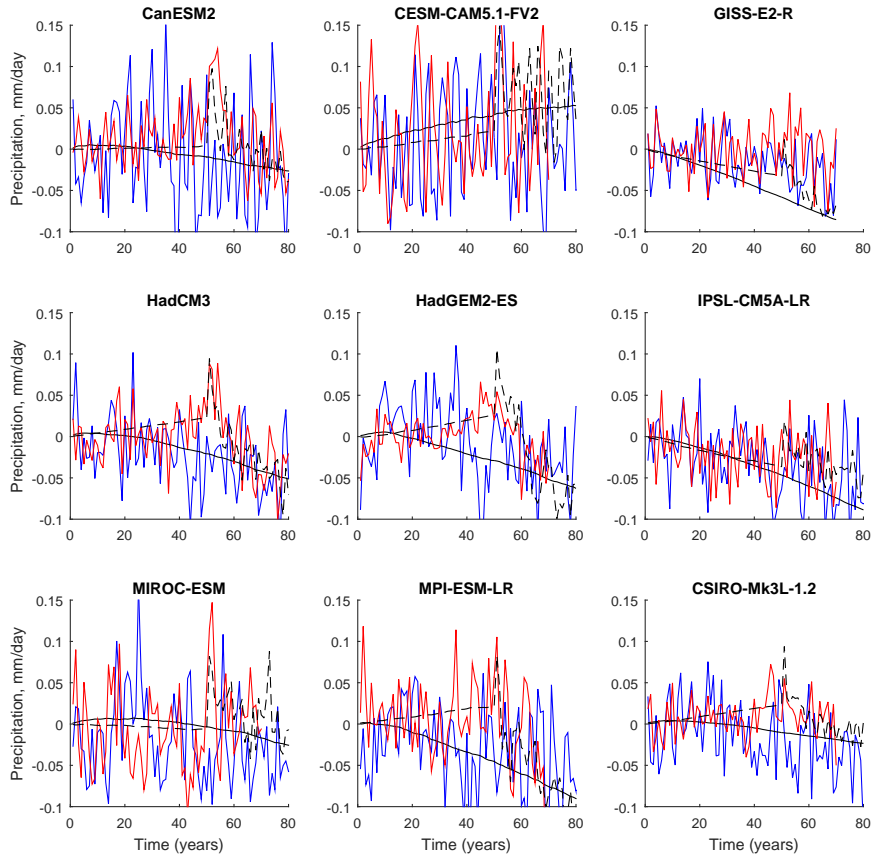

Figure S3: As in Figure 3 but for difference between average precipitation over land and average precipitation over oceans, for 1% per year increase in  $\text{CO}_2$  and GeoMIP experiment G2 for each of the climate models considered here.

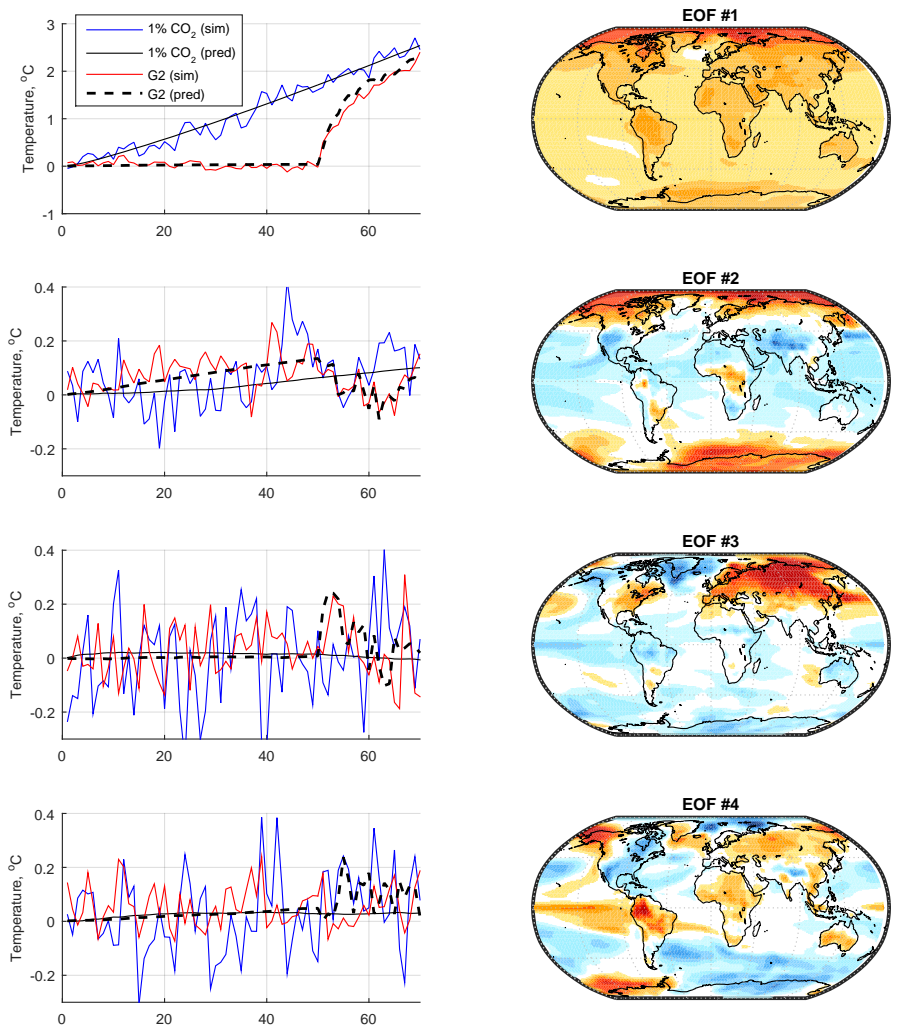

Figure S4: First few temperature EOFs for CanESM (right column), and the simulated and emulated time-history of the projection onto these EOFs for both 1% per year  $\text{CO}_2$  increase and G2 simulation for CanESM; other models give broadly similar results. The first EOF here gives the pattern of warming from  $\text{CO}_2$ , while the second captures most of the difference in the response between  $\text{CO}_2$  and solar forcing. In this model, higher EOFs are primarily describing natural variability rather than forced response.

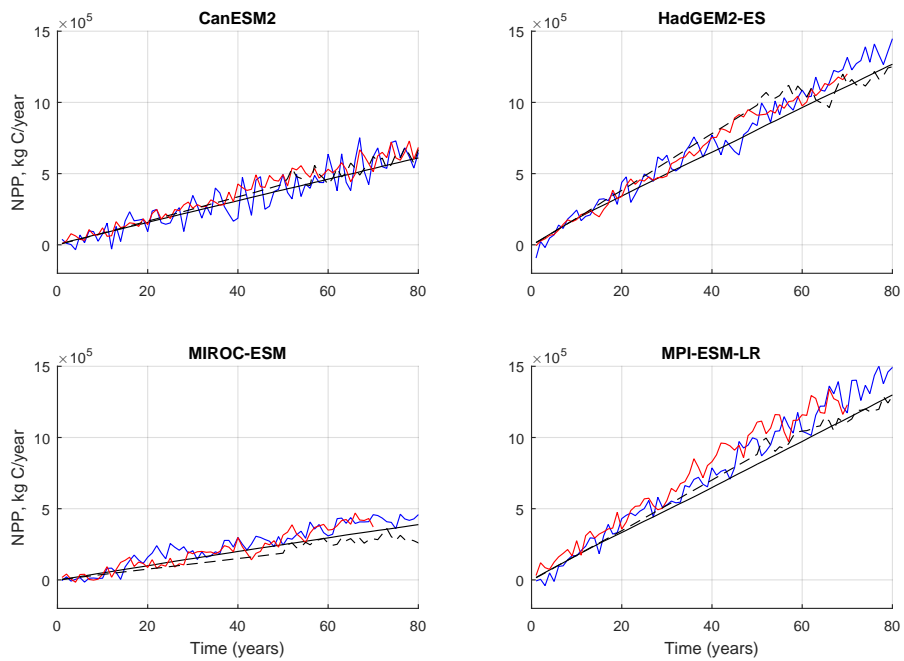

Figure S5: As in Figure 2 but for global mean net primary productivity (NPP). Simulated and emulated response are shown for 1% per year increase in CO<sub>2</sub> and GeoMIP experiment G2 for several of the climate models considered here (NPP was not available for all models).
